# Supplementary material for: Aberrant Expression of TLR2, TLR7, TLR9, Splicing Variants of TLR4 and MYD88 in Chronic Lymphocytic Leukemia Patients
Source: PubMed Central journal article supplement (PMC7922273; doi:10.3390/jcm10040867), 2021-02-19
Supplement: jcm-10-00867-s001.pdf [file jcm-10-00867-s001.pdf]

Supplementary Materials

**A**

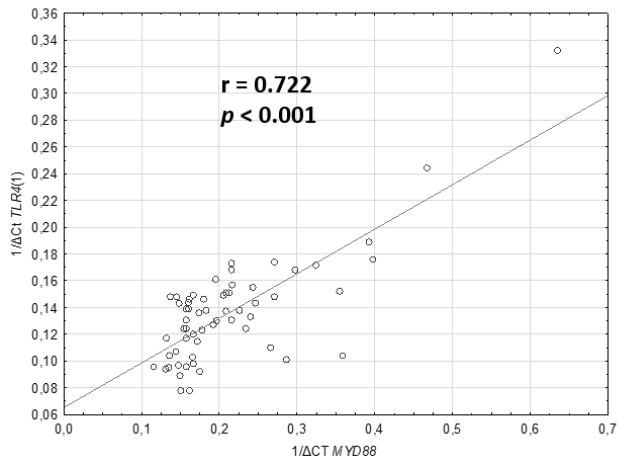

**B**

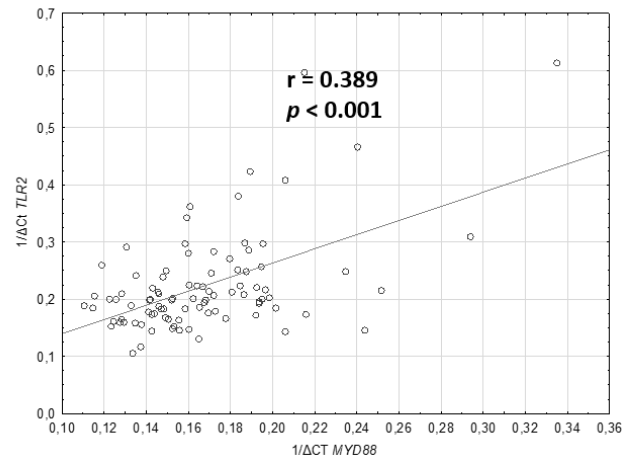

**Figure S1.** 637 Correlations between *TLR2* expression and *MYD88* expression in PBMC (**A**) and BMMC (**B**) in CLL.

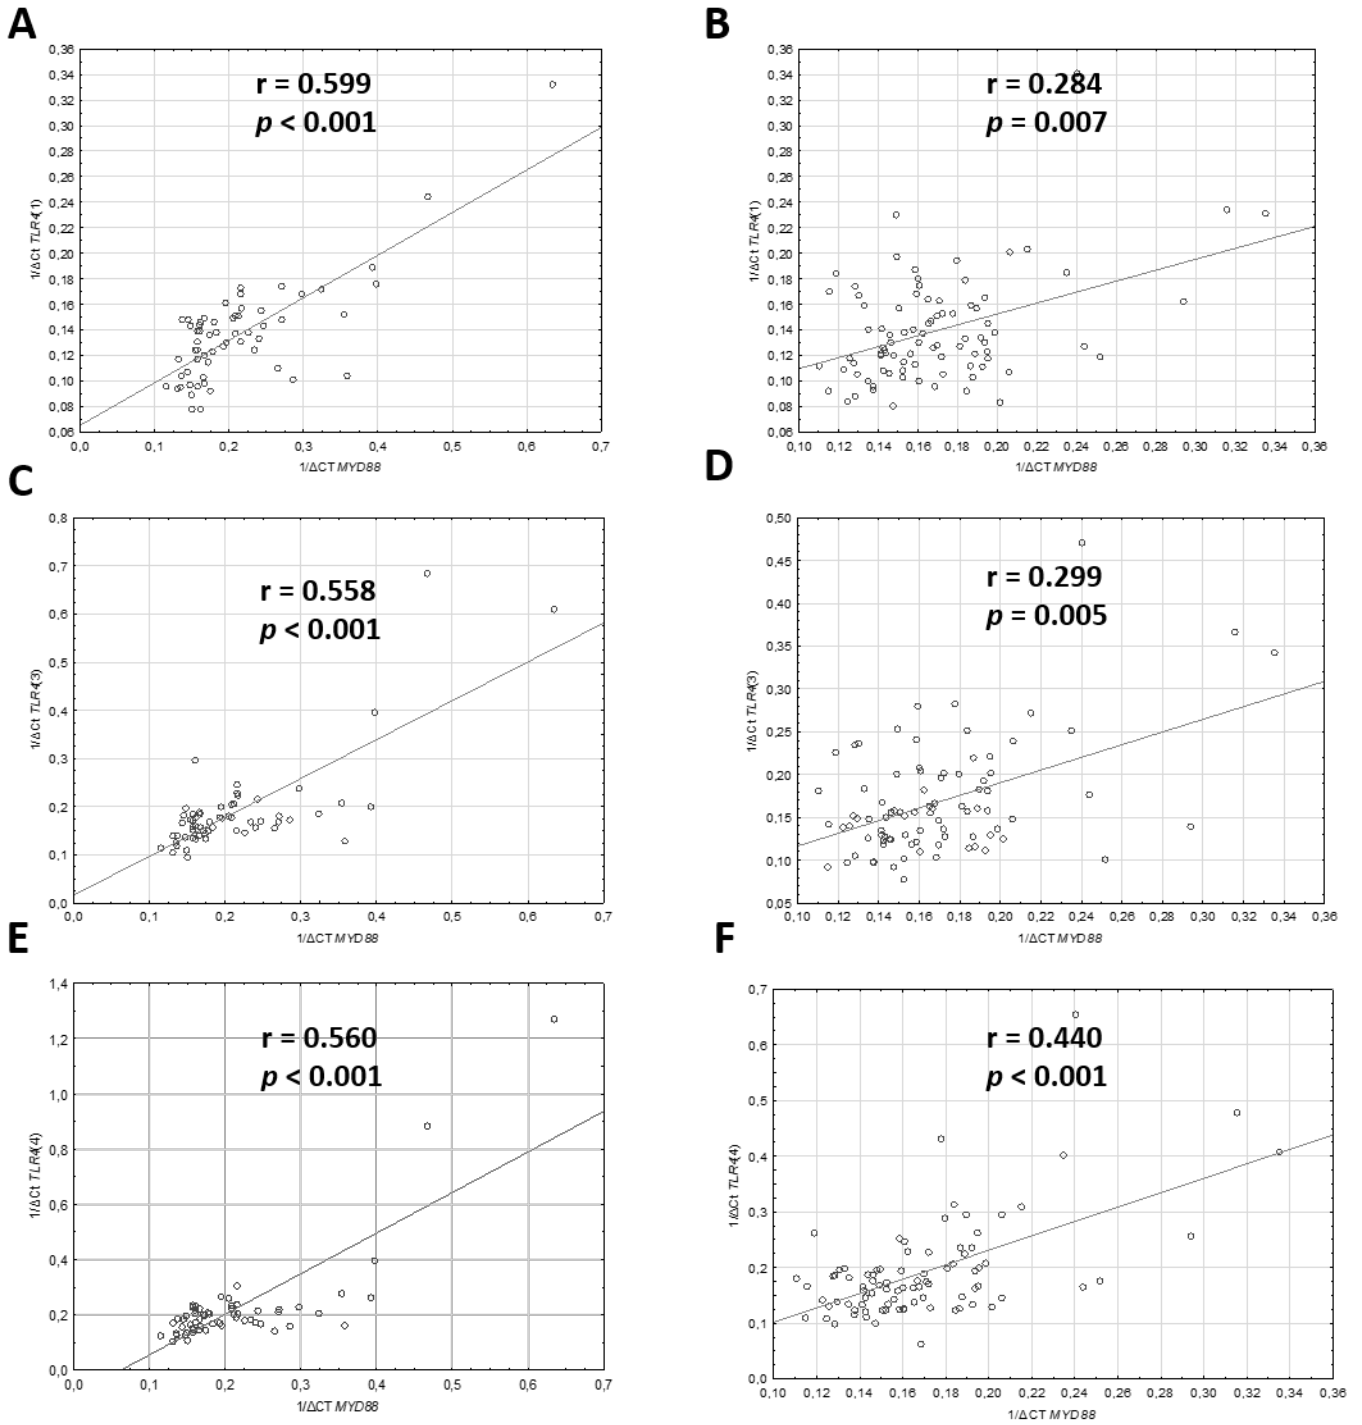

**Figure S2.** 638 Correlations between *TLR4* splice variants expression and *MYD88* expression in PBMC (A, C, E), and BMMC (B,D,F) in CLL.

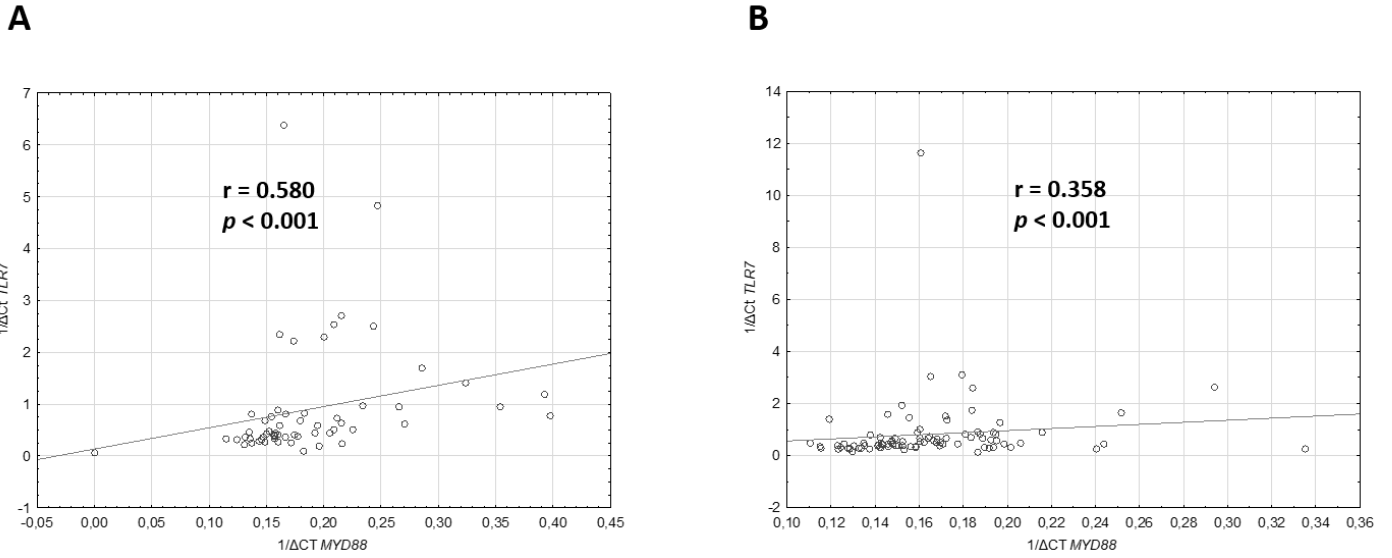

**Figure S3.** 639 Correlations between *TLR7* expression and *MYD88* expression in PBMC (A) and BMMC (B) in CLL.

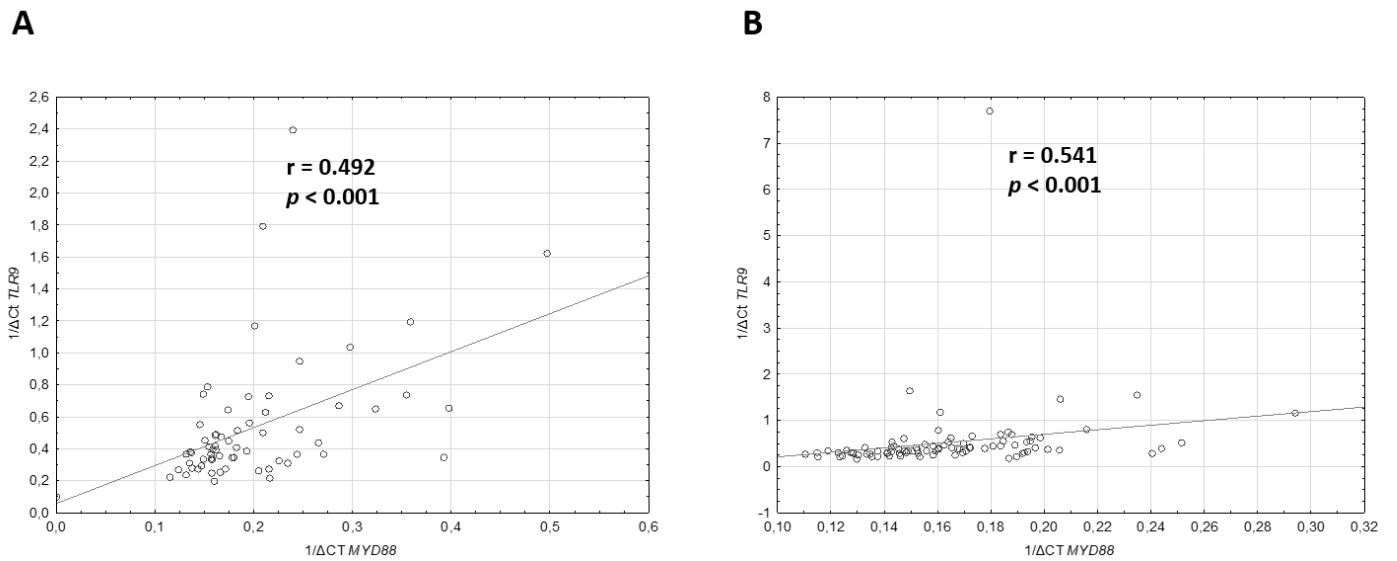

**Figure S4.** 640 Correlations between *TLR9* expression and *MYD88* expression in PBMC (A) and BMMC (B) in CLL.

**Table S1.** Expression of *TLRs* in A, B, C clinical stage of disease according to Binet scale.

| <b>Binet`s stage</b>  |          |          |          |                                            |
|-----------------------|----------|----------|----------|--------------------------------------------|
| <i>TLR</i>            | <b>A</b> | <b>B</b> | <b>C</b> | <b>Statistical significance (<i>p</i>)</b> |
| <i>TLR2</i> (PBMC)    | 0.225    | 0.1995   | 0.263    | 0.068                                      |
| <i>TLR2</i> (BMMC)    | 0.2010   | 0.1995   | 0.2070   | 0.96                                       |
| <i>TLR4(1)</i> (PBMC) | 0.1340   | 0.1360   | 0.1430   | 0.94                                       |
| <i>TLR4(1)</i> (BMMC) | 0.130    | 0.1270   | 0.1380   | 0.7123                                     |
| <i>TLR4(3)</i> (PBMC) | 0.1755   | 0.1570   | 0.1660   | 0.5377                                     |
| <i>TLR4(3)</i> (BMMC) | 0.1575   | 0.1520   | 0.1390   | 0.4459                                     |
| <i>TLR4(4)</i> (PBMC) | 0.2055   | 0.1830   | 0.1670   | 0.4907                                     |
| <i>TLR4(4)</i> (BMMC) | 0.1705   | 0.1760   | 0.1530   | 0.9505                                     |
| <i>TLR7</i> (PBMC)    | 0.4430   | 0.6415   | 0.4510   | 0.2273                                     |
| <i>TLR7</i> (BMMC)    | 0.4980   | 0.4365   | 0.3950   | 0.9978                                     |
| <i>TLR9</i> (PBMC)    | 0.3900   | 0.3660   | 0.5330   | 0.3733                                     |
| <i>TLR9</i> (BMMC)    | 0.3870   | 0.4135   | 0.290    | 0.1216                                     |

PBMC- peripheral blood mononuclear cells, BMMC- bone marrow mononuclear cells.
